# Supplementary material
Source: PubMed Central journal article supplement (PMC6294925)
Supplement: pnas.1814912115.sapp.pdf [file pnas.1814912115.sapp.pdf]

## Supplementary Information for

Comparative Genomics Reveals the Molecular Determinants of Rapid Growth of the Cyanobacterium *Synechococcus elongatus* UTEX 2973

Justin Ungerer, Kristen E. Wendt, John I. Henry, Costas D. Maranas and Himadri B. Pakrasi

Himadri B. Pakrasi  
Email: [Pakrasi@wustl.edu](mailto:Pakrasi@wustl.edu)

### **This PDF file includes:**

SI Methods  
Figs. S1 to S6  
Tables S1 and S2

### **Other supplementary materials for this manuscript include the following:**

Datasets S1 to S7

## SI Methods

**Construction of Plasmids.** For all cyanobacterial strains (See SI Appendix, Table S1) and primers (See SI Appendix, Table S2), the following naming convention was used. Plasmids to target any given gene were constructed using primers that are named beginning with the M744\_ locus tag. For example, primers used to make the editing vector to convert *Synechococcus* 2973 to the *Synechococcus* 7942 version of the M744\_01335 gene were all named beginning with 1335. Below we refer to this number as XXXX when referring to primers. To construct an editing vector, pSL2680 was digested with AarI restriction enzyme. XXXXgRNAL and XXXXgRNAR oligos were annealed and phosphorylated such that 5' overhangs were produced to be compatible with the digested pSL2680 vector. Annealed oligos were ligated into pSL2680 replacing lacZ, which was removed by AarI digestion. Blue/white screening was used to identify those colonies with an insert after transformation. Correct colonies were also verified by Sanger sequencing of the plasmid using the repairseqR primer. Repair templates were synthesized as right and left halves via PCR with Phusion high fidelity polymerase (Thermo) using the XXXXL/XXXXMR and XXXXML/XXXXR primer pairs. To generate a repair template to mutate *Synechococcus* 2973 to the *Synechococcus* 7942 allele of a gene, we used *Synechococcus* 7942 chromosomal DNA as template because it already contained the desired change. The two PCR fragments overlapped by 40 nucleotides, centered at the PAM site as well as 30 nucleotides with the vector. An additional mutation was introduced via the primers during PCR amplification to create a silent mutation, removing the PAM on the repair template. Next, we digested the plasmid containing the annealed and ligated oligos with KpnI while dephosphorylating it with FastAP (Thermo). The two PCR fragments that comprise the repair template were then assembled into the vector using Gibson assembly. Finally, the repair template was verified to be free of unintended mutations using Sanger sequencing.

For overexpression of *ppnK* from either strain, we amplified *Synechococcus* 2973 or *Synechococcus* 7942 chromosomal DNA with the 4780hisL/4780Re primer pair. The resulting PCR product was then digested with NdeI and KpnI and ligated into pET44b (29) digested with the same enzymes, resulting in N-terminal His-tagged PpnK. The overexpression strain with the *Synechococcus* 2973 allele was named pSL3052 while the overexpression strain with the *Synechococcus* 7942 allele was named pSL3053.

**Overexpression and purification of PpnK.** For overexpression of the two variants of PpnK, overnight cultures of either pSL3052 or pSL3053 were diluted 1:100 into 200 mL LB supplemented with 100 µg/mL ampicillin and grown to an OD600 of 0.5-0.7 at which time protein expression was induced by the addition of 1 mM IPTG. The cultures were then grown overnight at room temperature to allow for low level protein expression. Cells were then harvested and resuspended in 20 mL lysis buffer (20 mM sodium phosphate buffer, pH 8, 100 mM NaCl, 10% glycerol, 1 mM b-mercaptoethanol and protease inhibitor cocktail). Cells were chilled on ice and disrupted with five 30s bursts of sonication with a probe sonicator. The lysate was then clarified by centrifugation for 30 min at 45,000 g at 4°C. The lysate was transferred to a new tube, 4 mL 50% Ni-NTA resin slurry was added to the lysate and placed on a rocker at 4°C for 2 hours. The resin was then loaded on a 5 mL column (Pierce) and the supernatant was removed via centrifugation at 500g for 1 minute at 4°C. The column was then rinsed with 3 mL lysis buffer 5 times followed by 3 mL wash buffer (20 mM sodium phosphate buffer, pH 8, 100 mM NaCl, 10%

glycerol, 1mM b-mercaptoethanol, 10 mM imidazole) 5 times. Finally, the protein was eluted with 2 elutions of 3 mL elution buffer (20 mM sodium phosphate buffer, pH 8, 100 mM NaCl, 10% glycerol, 1 mM b-mercaptoethanol, 150 mM imidazole) and the two fractions were pooled. The protein was then concentrated and buffer exchanged with storage buffer (20 mM sodium phosphate buffer, pH 8, 100 mM NaCl, 10% glycerol, 1 mM b-mercaptoethanol) using 10K MWCO concentrator columns (Thermo). Protein concentration was adjusted to 1mg/mL for each sample using a Bradford assay. Purity of the sample was verified via SDS-PAGE. Aliquots of 25  $\mu$ L were snap frozen and stored at -80°C.

**77K Fluorescence.** Cultures were grown in MC-1000 multicultivators at 38°C, 5% CO<sub>2</sub> and either 900 or 400  $\mu$ mol m<sup>-2</sup> s<sup>-1</sup> light for *Synechococcus* 2973 and *Synechococcus* 7942 respectively. The fluorescence emission spectra of phycobilisomes from whole cells of each strain were measured at 77K with samples adjusted to equal cell number (2x10<sup>8</sup> cells per ml). Excitation occurred at 590 nm and fluorescence was recorded from 600 nm to 750 nm and normalized at 750 nm. The measurements were made on a SPEX fluoromax 2 spectrofluorometer and analyzed with Data Max for Windows.

**Absorption Spectra.** Cultures were grown in MC-1000 multicultivators at 38°C, 5% CO<sub>2</sub> and either 900 or 400  $\mu$ mol m<sup>-2</sup> s<sup>-1</sup> light for *Synechococcus* 2973 and *Synechococcus* 7942, respectively. Absorption spectra of *Synechococcus* 2973 and *Synechococcus* 7942 that were harvested during log phase were determined on an Olis DW-2000 spectrophotometer and data were analyzed with Olis Globalworks software. Spectra were normalized at 750 nm to correct for differences in light scattering.

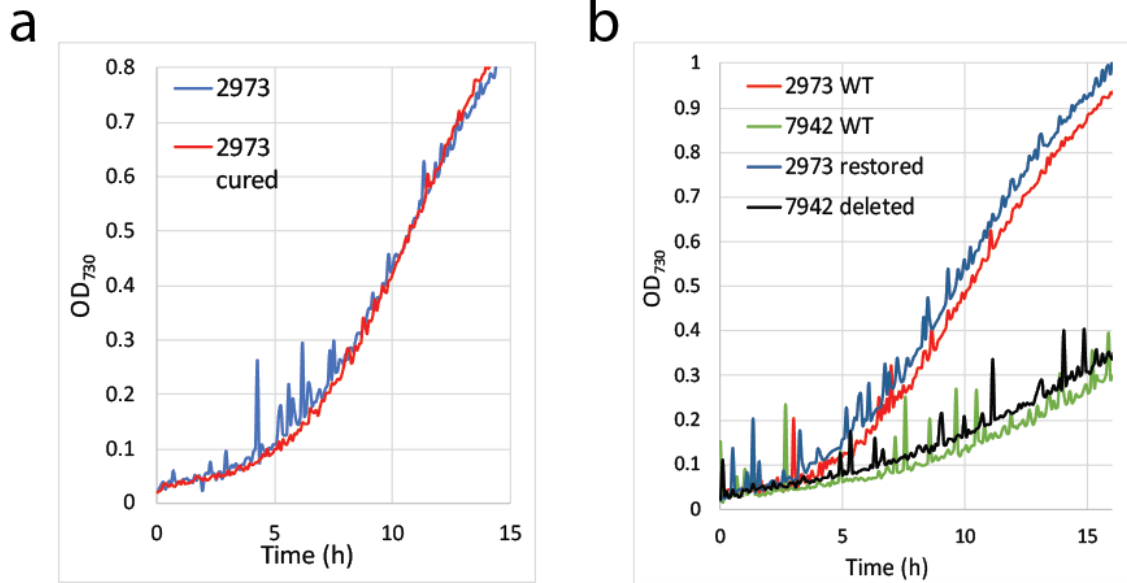

**Fig. S1. Comparison of growth between *Synechococcus* 2973 and *Synechococcus* 7942 strains.** (a) Wild type *Synechococcus* 2973 compared to the same strain after its small plasmid has been cured. (b) Growth of wild type *Synechococcus* 2973 compared to the same strain with the 7-kb deletion restored and growth of wild type *Synechococcus* 7942 compared to the same strain with the 7-kb deletion incorporated.

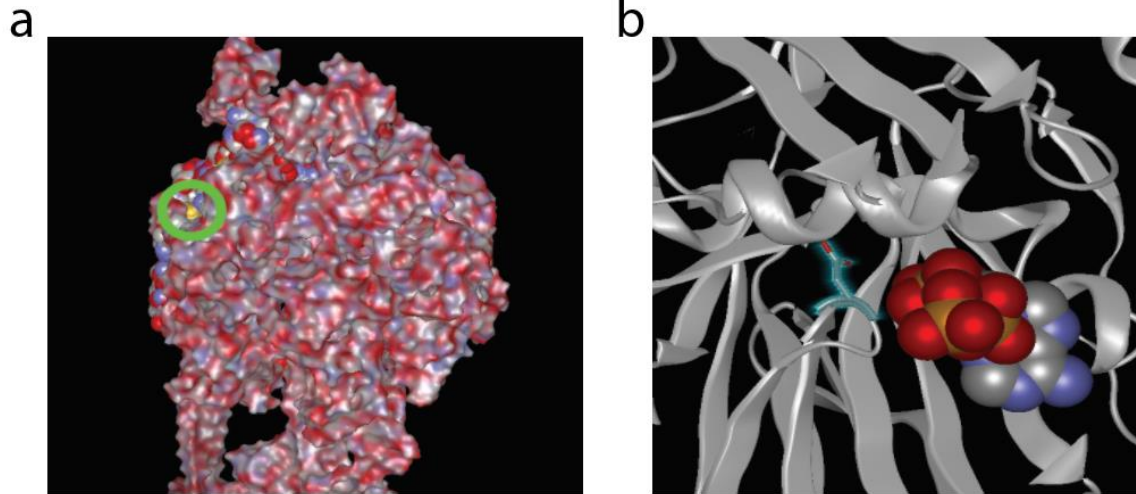

**Fig. S2. Predicted structures of ATP synthase and NAD<sup>+</sup> kinase from *Synechococcus* strains.** (a) Surface map of ATP synthase from *Synechococcus* 7942. Red: negative charge, blue: positive charge. Yellow: C252 on the surface circled in green. (b) Local ribbon diagram of NAD<sup>+</sup> kinase active site from *Synechococcus* 2973 associated with ATP. E260, the amino acid changed by the SNP, is the only amino acid whose side chain is depicted in detail. Additionally, this amino acid is highlighted in blue. ATP is shown as space filling. Red: oxygen, yellow: phosphorus, blue: nitrogen, grey: carbon.

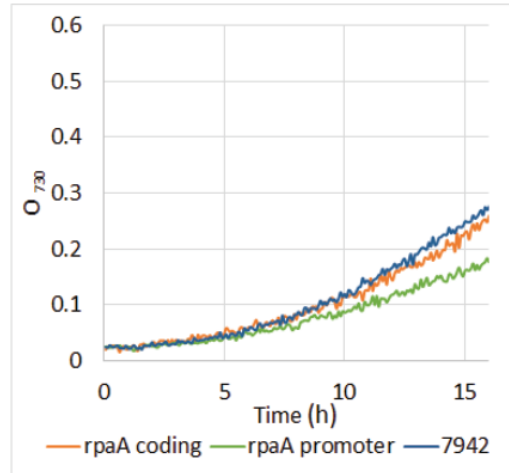

**Fig. S3. Growth of *Synechococcus* 7942 and *Synechococcus* 7942 with the pair of coding SNPs or the promoter SNP from *Synechococcus* 2973.**

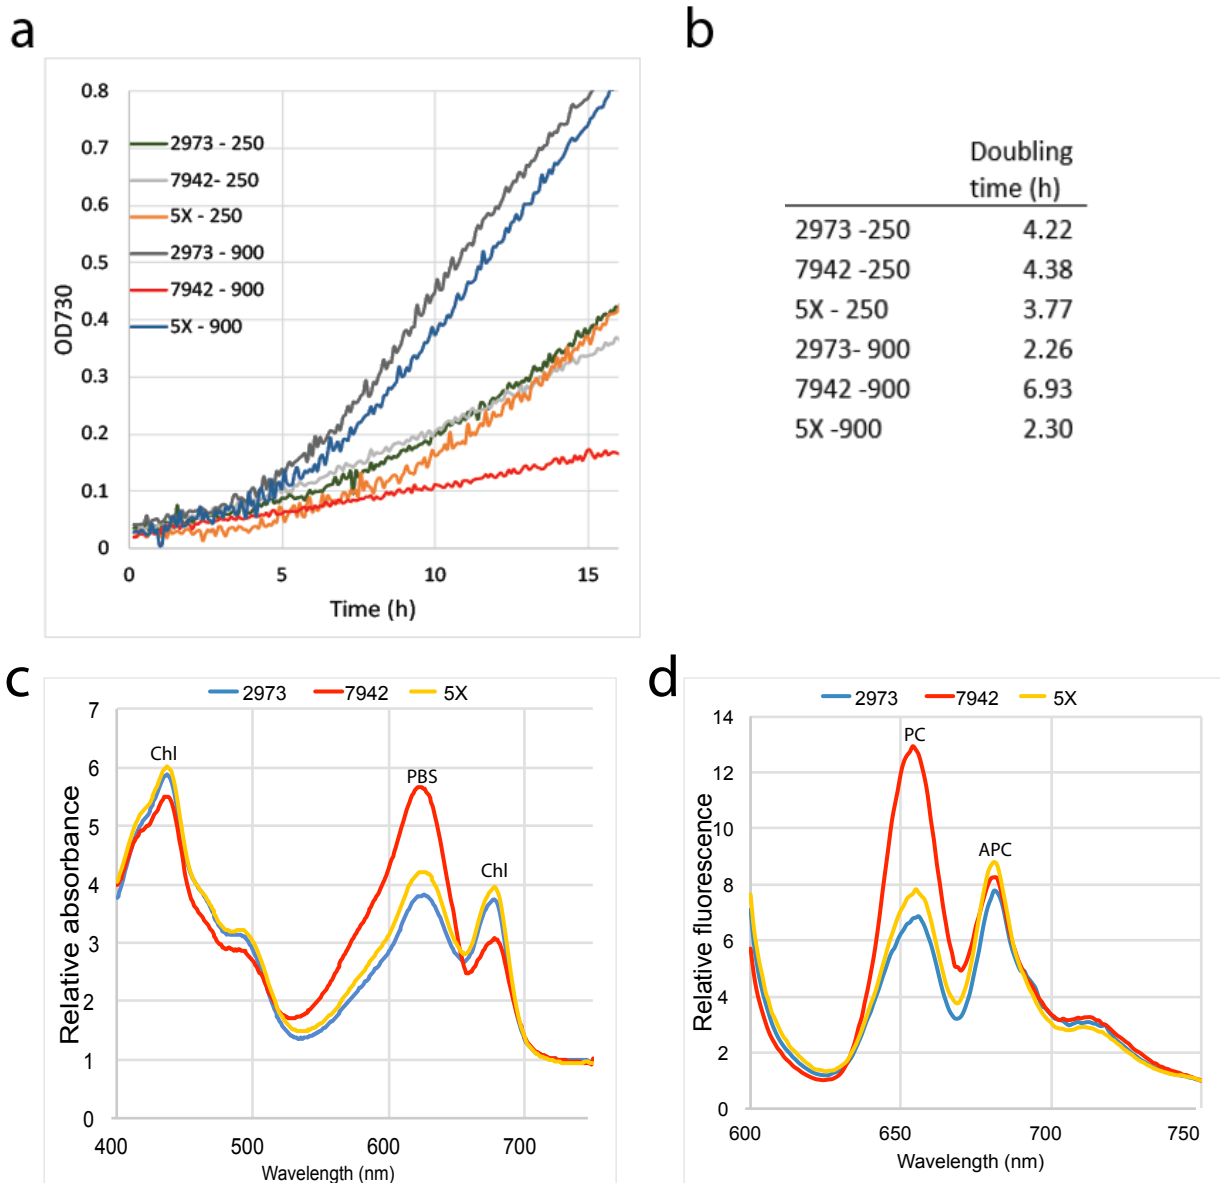

**Fig. S4. Physiological Comparison of *Synechococcus* 7942 and *Synechococcus* 2973.** (a) Representative growth of wild type *Synechococcus* strains and *Synechococcus* 7942 with 3 alleles converted to the *Synechococcus* 2973 version (5X). (b) Doubling times calculated from (a). Numbers indicate light intensity in  $\mu\text{mol m}^{-2} \text{s}^{-1}$ . (c) Absorbance scan of either wild type or the 5X mutant normalized at 750nm. (d) 77K fluorescence emission spectra of either wild type or the 5X mutant normalized at 750nm. Chl, chlorophyll; PBS, phycobilisomes; PC, phycocyanin; APC, allophycocyanin.

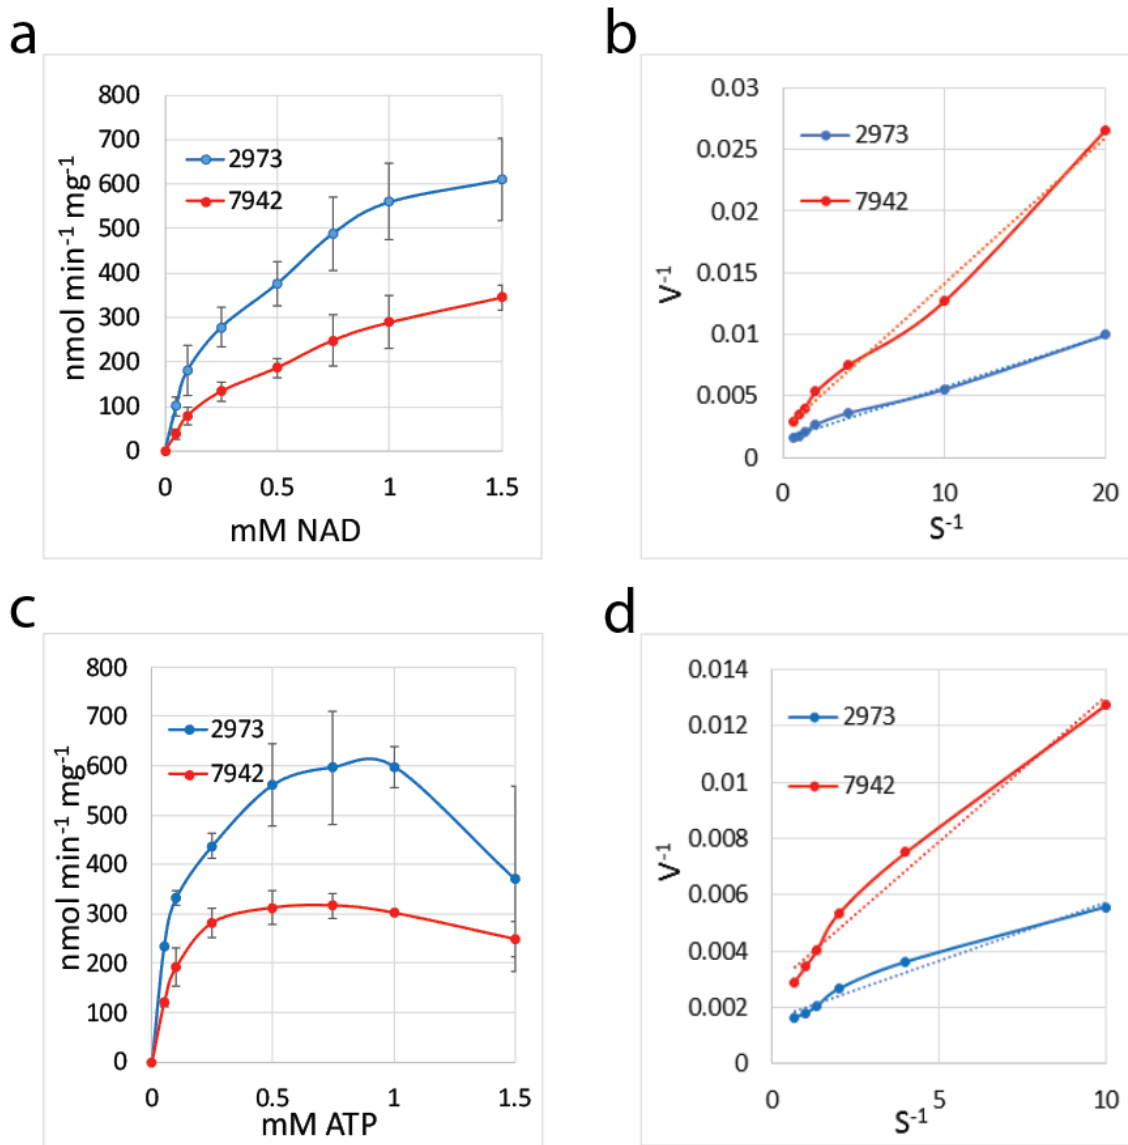

**Fig. S5. Enzyme kinetics of the *Synechococcus* 7942 and *Synechococcus* 2973 alleles of NAD<sup>+</sup> kinase.** (a) Michaelis-Menten plot of NAD<sup>+</sup> kinase activity at various NAD concentrations. (b) Lineweaver-Burke plot of NAD<sup>+</sup> kinase activity at various NAD concentrations. (c) Michaelis-Menten plot of NAD<sup>+</sup> kinase activity at various ATP concentrations. (d) Lineweaver-Burke plot of NAD<sup>+</sup> kinase activity at various ATP concentrations (n=3).



Fig.

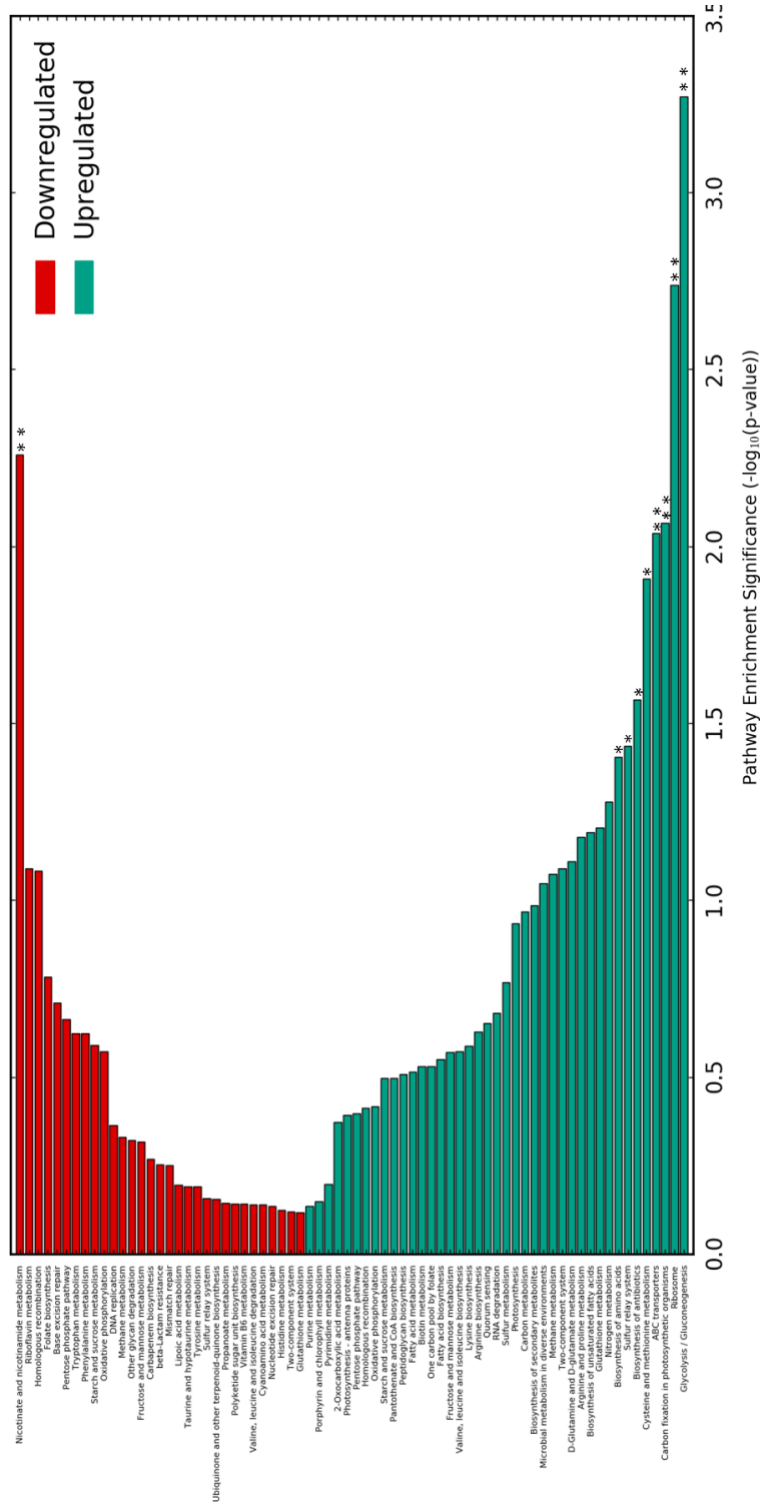

**S6. Bar graph comparing the  $-\log_{10}(\text{p-value})$  of individual pathways.** The data from the analysis of the upregulated and down regulated genes are combined in one plot. The green bars correspond to the pathways represented among the upregulated genes and the red bars correspond to pathways overrepresented among the down regulated genes. \*indicates p-value < 0.05 and \*\* indicates p-value < 0.01. Upregulated and downregulated refer to those in *Synechococcus* 2973 when compared against *Synechococcus* 7942.

**Table S1: Cyanobacterial Strains****Reversions of *Synechococcus* 2973 coding SNPs to *Synechococcus* 7942 alleles**

| <b>Locus Tag</b> | <b>Annotation</b>                             | <b>Strain Name</b> |
|------------------|-----------------------------------------------|--------------------|
| M744_705         | Hypothetical protein                          | SL2820             |
| M744_1335        | ATP synthase FOF1 subunit alpha               | SL2770             |
| M744_2605-1      | RpaA, Circadian Regulator                     | SL2790             |
| M744_2605-2      | RpaA, Circadian Regulator                     | SL2790             |
| M744_3335        | Manganese ABC transporter ATP-binding protein | SL2849             |
| M744_3855        | Guanylate cyclase                             | SL2821             |
| M744_4780        | PpnK                                          | SL2848             |
| M744_5865        | Hypothetical protein                          | SL2822             |
| M744_6025        | Molecular chaperone DnaK                      | SL2791             |
| M744_6570-1      | Hydrolase                                     | SL2792             |
| M744_6570-2      | Hydrolase                                     | SL2792             |
| M744_6650-1      | CTP synthetase                                | SL2850             |
| M744_6650-2      | CTP synthetase                                | SL2856             |
| M744_6850        | Chorismate mutase                             | SL2811             |
| M744_8615        | DNA-directed RNA polymerase $\beta$ subunit   | SL2768             |
| M744_11685       | Anthranilate synthase                         | SL2803             |
| M744_12130-1     | Long-chain-fatty-acid CoA ligase              | SL2916             |
| M744_12130-2     | Long-chain-fatty-acid CoA ligase              | SL2815             |
| M744_12285       | Glutamate synthase                            | SL2771             |
| M744_13540       | Photosystem I assembly protein Ycf4           | SL2755             |

**Reversions of *Synechococcus* 2973 noncoding SNPs to *Synechococcus* 7942 alleles**

| <b>Nucleotide Position</b> | <b>Annotation</b>                        | <b>Strain Name</b> |
|----------------------------|------------------------------------------|--------------------|
| 474883                     | Missing: ACTATCAT                        | SL2942             |
| 1042862                    | T:C                                      | SL2943             |
| 1533430                    | G:A                                      | SL2965             |
| 1741647                    | C:A                                      | SL2966             |
| 2139224                    | Missing: T                               | SL2944             |
| 2347222                    | A:G                                      | SL2939             |
| 2348957                    | G:T                                      | SL2941             |
| 2347664-2347720            | Insertion 56 nucleotides                 | SL2940             |
| 474883 with 2605 1&2       | Combined SL2942 and SL2790 in one strain | SL2942-2           |

**Introduction of *Synechococcus* 2973 SNPs into *Synechococcus* 7942**

|                      |                                                                     |          |
|----------------------|---------------------------------------------------------------------|----------|
| M744_1335            | ATP synthase FOF1 subunit alpha                                     | SL2851   |
| M744_2605-1          | Chemotaxis protein CheY                                             | SL2982   |
| M744_2605-2          | Chemotaxis protein CheY                                             | SL2982   |
| M744_4780            | PpnK                                                                | SL2860   |
| NC-474883            | RpaA - two component transcriptional regulator, winged helix family | SL2993   |
| 2X                   | SL2851 and SL2860 combined in one strain                            | SL2860-2 |
| 2X                   | SL2993 and SL2982 combined in one strain                            | SL2993-2 |
| 5X                   | SL2851, SL2860, SL2982, SL2993 combined in one strain               | SL2993-3 |
| 474883 with 2605 1&2 | SL2982 and SL2993 combined in same strain                           | SL2993-4 |
|                      | cure 2973 of plasmid                                                | SL2812   |
|                      | Reintroduction of genes in deletion into <i>Synechococcus</i> 2973  | SL2923   |
|                      | Creation of 7 kb deletion in <i>Synechococcus</i> 7942              | SL3001   |

**Table S2: Primers used in this study**

| Primer name | Sequence (5' to 3')                                             |
|-------------|-----------------------------------------------------------------|
| repair seqR | cgtgccccgattacagatc                                             |
| 8615gRNAL   | agat CTCGCAACTCTCGCAGTTCA                                       |
| 8615gRNAR   | agac TGAACTGCGAGAGTTGCGAG                                       |
| 8615L       | ggtcattttttgtctagctttaatgcggtagttGGTACC GCCCCTGATGACTGATCGCG    |
| 8615ML      | CAAAGAATTCTTTGGaTCCTCGCAACTCTCGC                                |
| 8615MR      | GCGAGAGTTGCGAGGAtCCAAAGAATTCTTTG                                |
| 8615R       | cgtgccccgattacagatcctctagatcagcGGTACC GTGGCAGAACCGTCAGCAATC     |
| 8615seqM    | GCTGGAATCGCGGTTCTTCG                                            |
| 13540gRNAL  | agat ACAGCAGCCAATCTTGGGAT                                       |
| 13540gRNAR  | agac ATCCCAAGATTGGCTGCTGT                                       |
| 13540L      | ggtcattttttgtctagctttaatgcggtagttGGTACC GTACGGACGGACGCCACC      |
| 13540ML     | GTTGAGACGGATTCaTTACAGCAGCCAATCTTGGGAT                           |
| 13540MR     | ATCCCAAGATTGGCTGCTGTAAAtGAATCCGCTCAAC                           |
| 13540R      | cgtgccccgattacagatcctctagatcagcGGTACC GCTGGTGCCGTCGTAAACTC      |
| 13540seqM   | CACGACCTAAGATCGAGACCG                                           |
| 1335gRNAL   | agatCCGCCAGATGTCGCTGCTGC                                        |
| 1335gRNAR   | agacGCAGCAGCGACATCTGGCGG                                        |
| 1335L       | ggtcattttttgtctagctttaatgcggtagttGGTACC CATTGTCAGCAGATTGAGCAG   |
| 1335ML      | CCAAGCAAGCGCAGGCgTACCGCCAGATGTCGC                               |
| 1335MR      | GCGACATCTGGCGGTAcGCCTGCGCTTGCTTGG                               |
| 1335R       | cgtgccccgattacagatcctctagatcagcGGTACC CGACTAGACAGCAGCCAAGATG    |
| 1335seqM    | GCCTCTTCGGTTGCCAAC                                              |
| 12285gRNAL  | agatCACCACCGCCTCACCACGAC                                        |
| 12285gRNAR  | agacGTCGTGGTGAGGCGGTGGTG                                        |
| 12285L      | cattttttgtctagctttaatgcggtagttGGTACCGTCGAC GCTACCCAGCTATCACGGTG |
| 12285ML     | GGTGTCTCGCTAATaTCACCACCGCCTCACCACGAC                            |
| 12285MR     | GTCGTGGTGAGGCGGTGGTGAtATTAGCGAGACACC                            |
| 12285R      | ccgttgcgctgccccgattacagatcctctagaGTCGAC GTTGACGATCGCTTGCTCG     |
| 12285seqM   | CTCGCATCGCCATGAACC                                              |
| 2885gRNAL   | agatTCATTATCGTTGGCATCTTG                                        |
| 2885gRNAR   | agacCAAGATGCCAACGATAATGA                                        |
| 2885L       | ggtcattttttgtctagctttaatgcggtagttGGTACC CCGTCGAAGCATCATCAACAATG |
| 2885ML      | CGAGTTGCTGGTCGTaATCATTATCGTTGGCATC                              |
| 2885MR      | GATGCCAACGATAATGATtACGACCAGCAACTCG                              |
| 2885R       | cgtgccccgattacagatcctctagatcagcGGTACC GCAGATAACGTAGACGGAGCG     |
| 2885seqM    | CCAATGCGGACGGAGCCAAAG                                           |
| 3975gRNAL   | agat AGGTCTTCCCGCAGGTCAA                                        |
| 3975gRNAR   | agac TTTGACCTGCGGGAAGACCT                                       |
| 3975L       | ggtcattttttgtctagctttaatgcggtagttGGTACC CCAGTACGGATTGCAAGAAGC   |
| 3975ML      | CACGTCCTTAATaCAGGTCTTCCCGCAGGTCAAATC                            |
| 3975MR      | GATTTGACCTGCGGGAAGACCTGtATTAAGGACGTG                            |
| 3975R       | cgtgccccgattacagatcctctagatcagcGGTACC GGACTGCAGCTGCAAGCCAG      |
| 3975seqM    | CTGATGTGGGCGTGGTGTGG                                            |
| 2605gRNAL   | agat CCCATGCAGCCCGCCATAGC                                       |
| 2605gRNAR   | agac GCTATGGCGGGCTGCATGGG                                       |

2605L ggtcattttttgtctagctttaatgcggtagttGGTACC GCCCTGCGTCTCAATTAATCTCC  
2605ML GCTGCAGCGCACCGATCGCATaCCCCATGCAGCCCGCCATAGC  
2605MR GCTATGGCGGGCTGCATGGGGtATGCGATCGGTGCGCTGCAGC  
2605R cgctgcccggattacagatcctctagatgcgacGGTACC GAGTCTGAGCTGCTACTGCC  
2605seqM GTTTGTCTCTCCCGAATGTTACC  
6025gRNAL agat CGATTTTGCAGCTCGGCGAT  
6025gRNAR agac ATCGCCGAGCTGCAAAATCG  
6025L ggtcattttttgtctagctttaatgcggtagttGGTACC GTTTGAAGCGTATCGGCGTC  
6025ML GGGCAGCACCTTCGATGTaTCGATTTTGCAGCTCGGCGATA  
6025MR TATCGCCGAGCTGCAAAATCGAtACATCGAGGGTGTGCCC  
6025R cgctgcccggattacagatcctctagatgcgacGGTACC GAATGCCGTCAGCATCAATATCG  
6025seqM CCGCGATCGCGTCTGTACCC  
6570gRNAL agat GGATTGCGGCCAGATCATC  
6570gRNAR agac GATGATCTGGGCCGCAATCC  
6570L ggtcattttttgtctagctttaatgcggtagttGGTACC GTAAC TGGGTCGCCGTCATGG  
6570ML CACGAGCGAAGGACGCGATaTGGATTGCGGCCAGATCATC  
6570MR GATGATCTGGGCCGCAATCCaATCGCGTCTTCGCCTCGTG  
6570R cgctgcccggattacagatcctctagatgcgacGGTACC CTTATACCAAGCAGCTGAACCTGC  
6570seqM CCTAGAAGGGGTGGATGCAATC  
6650gRNAL agat ACTGGGCACGTAATGTGGCA  
6650gRNAR agac TGCCACATTACGTGCCAGT  
6650L ggtcattttttgtctagctttaatgcggtagttGGTACC GGTGACTATAACGGTGGCAGC  
6650ML CTAGGGATGCAAGCAGCGGTGATaGACTGGGCACGTAATGTGGCAG  
6650MR CTGCCACATTACGTGCCAGTcATCACCGCTGCTTGATCCCTAG  
6650R cgctgcccggattacagatcctctagatgcgacGGTACC CGTTTAATCCTCGTAGGTCGCC  
6650seqM GGTGATGCGGAAGATCTCG  
12130gRNAL agat GATCTATACCTCGGGACCA  
12130gRNAR agac TGGTGCCCGAGGTATAGATC  
12130gRNAL2 agatCTCACGGCAACCTGCTGCAC  
12130gRNAR2 agacGTGCAGCAGGTTGCCGTGAG  
121230L ggtcattttttgtctagctttaatgcggtagttGGTACC GAGTACTGGAACCGCCCTC  
12130MR TCGATCGCTTAGCCACaTTGATCTATACCTCGGGCACCAC  
12130ML GTGGTGCCCGAGGTATAGATCAAtGTGGCTAAGCGATCGA  
12130R cgctgcccggattacagatcctctagatgcgacGGTACC CGGTCTTGTCACCAACATG  
12130seqM CCACCGAAGGGCGTGATGC  
11685gRNAL agat CAACGGATCTGCTGGCTGAT  
11685gRNAR agac ATCAGCCAGCAGATCCGTTG  
11685L ggtcattttttgtctagctttaatgcggtagttGGTACC GGTTGCGATCCACTCTGGGTG  
11685ML GCACCAGAAGATGCCGCCTaGCAACGGATCTGCTGGCTGATCC  
11685MR GGATCAGCCAGCAGATCCGTTGcIAGGGCGGCATCTTCTGGTGC  
11685R cgctgcccggattacagatcctctagatgcgacGGTACC GCGATCGCAGAGCAATTCATTC  
11685seqM CGACTGGCAGTTGATCGGCTC  
6850gRNAL agat AAGTGGCGATCGTGGGCAAGT  
6850gRNAR agac ACTTGCCACGATCGCCACTT  
6850L ggtcattttttgtctagctttaatgcggtagttGGTACC CAAGTCGCGGGGCTATTCGG  
6850ML CATCGCTAGAACTCAGGTTAcGaTcGAcCaTGAATGACTTAGACCTG  
6850MR CAGGTCTAAGTCATTGCaTGcGAtCgTAACCTGAGTTCTAGCGATG

|             |                                                                  |
|-------------|------------------------------------------------------------------|
| 6850R       | cgctccccgattacagatcctctagagtcgacGGTACC CGGAAAGACGGGTGCAGATC      |
| 6650gRNAL2  | agat TCGAGCGTCCTGATCATCCC                                        |
| 6650gRNAR2  | agac GGGATGATCAGGACGCTCGA                                        |
| 6650L2      | ggtcattttttgtctagctttaatgcggtagttGGTACC CAAGTCGCGGGGCTATTCGG     |
| 6650ML2     | CAGCCACTTGGTGGAGATaGTCGAGCGTCCTGATCATCCC                         |
| 6650MR2     | GGGATGATCAGGACGCTCGACtATCTCCACCAAGTGGCTG                         |
| 6650R2      | cgctccccgattacagatcctctagagtcgacGGTACC CCTCCAGCGAATGTTGCTTTC     |
| 6850seqM    | GTGCAGCAAATGTATGTGGAGG                                           |
| 6650L3      | CAGCCgCTTGGTGGAGATaGTCGAGCGTCCTGATCATCCC                         |
| 6650R3      | GGGATGATCAGGACGCTCGACtATCTCCACCAAGcGGCTG                         |
| 4780gRNAL   | agat GGCCAGAAGAcCGGGTGTTA                                        |
| 4780gRNAR   | agac TAACACCCGgTCTTCTGGCC                                        |
| 4780L       | ggtcattttttgtctagctttaatgcggtagttGGTACC CAGCAAACCGAGAGCCTGC      |
| 4780ML      | GCCGGTTGCTATGTaTGGCCAGAAGAGCGGGTGTTAATC                          |
| 4780MR      | GATTAACACCCGCTCTTCTGGCCAtACATAGCAACCGGC                          |
| 4780R       | cgctccccgattacagatcctctagagtcgacGGTACC CGTGGAAAGGTCGAGGGTTAAG    |
| 4780seqM    | CGAATCGGGAACCCATGACC                                             |
| 3335gRNA-L  | agat CTCAGGGGgATCCGCGCTTG                                        |
| 3335gRNA-R  | agac CAAGCGCGGATcCCCCTGAG                                        |
| 3335-L      | ggtcattttttgtctagctttaatgcggtagttGGTACC GCAACTAAGCTGACGCTGAC     |
| 3335-MR     | GACCAAGCGCGGATGCCCTGAGCtATCACACGCTGATTCAGCAG                     |
| 3335-ML     | CTGCTGAATCAGCGTGTGATaGCTCAGGGGCATCCGCGCTTGGTC                    |
| 3335-R      | cgctccccgattacagatcctctagagtcgacGGTACC CGACGAGACTGGAACCACTC      |
| 3335seqM    | CCACATGTCGCCTATGTTCC                                             |
| 3855gRNA-L  | agat CCCTCAAGGATCTGGTCGCG                                        |
| 3855gRNA-R  | agac CGCGACCAGATCCTTGAGGG                                        |
| 3855-L      | ggtcattttttgtctagctttaatgcggtagttGGTACC ACCGGCTATCGCTGTCTGATTGCC |
| 3855-MR     | CGCGCGACCAGATCCTTGAGGGCtATGACTGGTGAAAGGCTAGC                     |
| 3855-ML     | GCTAGCCTTTCACCAGTCATaGCCCTCAAGGATCTGGTCGCGCG                     |
| 3855-R      | cgctccccgattacagatcctctagagtcgacGGTACC CGCAGCAGCATCGTCATGATCAAG  |
| 3855seqM    | GCCCAGGATCTCCAGCTACC                                             |
| 5865gRNA-L  | agat CATCATTGCTTCGCTCTACC                                        |
| 5865gRNA-R  | agac GGTAGAGCGAAGCAATGATG                                        |
| 5865-L      | ggtcattttttgtctagctttaatgcggtagttGGTACC CGAAATCATGCAGGTCTATGGC   |
| 5865-MR     | CTGGTAGAGCGAAGCAATGATGCtGACAGCGCGACCGCAGTC                       |
| 5865-ML     | GACTGCGGTCGCGCTGTCagGCATCATTGCTTCGCTCTACCAG                      |
| 5865-R      | cgctccccgattacagatcctctagagtcgacGGTACC CCGCTCTGATTCTGGGCGAC      |
| 5865seqM    | GGCGCCTCTGGAAGAGTTTG                                             |
| 131199gRNAL | agat aaaactgcatagagatgaga                                        |
| 131199gRNAR | agac tctcatctctatgcagttt                                         |
| 131199L     | ggtcattttttgtctagctttaatgcggtagttGGTACC ctcagttcagattgcaggetg    |
| 131199MR    | caatcaaggatgatgagatggtgtctgtgatacctacatctcatctctatgcagtttcaagg   |
| 131199ML    | cctagaaaactgcatagagatgagatgtaggtatcacagaccatctcatcacttgattg      |
| 131199R     | cgctccccgattacagatcctctagagtcgacGGTACC cctggccatggttagatcacc     |
| 131199seqM  | gtatc ggaaggtaggaatgctgag                                        |
| 131199chrR  | catcggcggttcggacctc                                              |
| 13203gRNL   | agat caagcaacctgaccgcgtg                                         |

13203gRNAR agac cacgcggtccagggtgcttg  
13203L ggtcattttttgtctagctttaatgcggtagtGGTACC gctcattgattcgggtgatggg  
13203MR gcttgatacagcgcgttactataaftcgcgcagtcatgggtg  
13203ML cacccatgactgcgcgcaattatagtaacgcgctgtatcaagc  
13203R cgctgcccggattacagatcctctagagtcgacGGTACC ccagctgactatctcaatgatgctg  
13203seqM cagagaatgaaccgctgcag  
13203chrR gactgggatccctgctcagc  
13206gRNAL agat ggagaacttattcgcgccgg  
13206gRNAR agac ccggggcgaataagttctcc  
13206L ggtcattttttgtctagctttaatgcggtagtGGTACC ccaccaattatgattagcactggac  
13206MR ccggggcgaataagttatcctaagagagggagagtgagcc  
13206ML ggctcactcctcctcttaaggataacttattcgcgccgg  
13206R cgctgcccggattacagatcctctagagtcgacGGTACC gtggcacagtcgatccaacag  
13206seqM ggctaacaaggctagcagcgg  
13206chrR gcccaactcagacaacaacc  
13204gRNAL agat ggctgcctaattgtcacgtc  
13204gRNAR agac gacgtgacattaggcagccc  
13204L ggtcattttttgtctagctttaatgcggtagtGGTACC gttcgggtttggctagtctg  
13204MR TCACGCTGCCGTTATTCTTATTCTTCTCGAAGTTCGCAAC  
13204ML GTTGCGAACTTCGAAGAAGAAT AAGGAATAACGGCAGCGTGA  
13204R cgctgcccggattacagatcctctagagtcgacGGTACC tggaaactccagtcactctctactg  
13204seqM ctgacgattaccggctgatc  
13204chrR cacaaggcggaggtagcttc  
131058gRNAL agat atccgctgtaagcgcgctgcc  
131058gRNAR agac ggcagcggcttacagcggat  
131058L ggtcattttttgtctagctttaatgcggtagtGGTACC gttgtcagcaaggattccgagg  
131058MR cagcggatctattatgttttcttaaaaATGATAGTggctctgttctggtgag  
131058ML ctaccagaacagagccACTATCATtttaagaaaacataaatagatccgctg  
131058R cgctgcccggattacagatcctctagagtcgacGGTACC gcgcagatgacggatgtgg  
131058seqM ctaaaaccgaaaagctcggac  
131058chrR gttttgatgtagcgcgggtgc  
131660gRNAL agat atcttcttggctctgtcgc  
131660grRNAR agac gcgacagagcgaagaagat  
131660L ggtcattttttgtctagctttaatgcggtagtGGTACC gagccgcttcatgtgcctg  
131660MR caaagaagatataccttctcagttgggtaggagcagtgttg  
131660ML caaacactgctcctaccactgagaaggatatctctttg  
131660R cgctgcccggattacagatcctctagagtcgacGGTACC catgagcacgaggggtc  
131660seqM ccagaccagaaaagctcctg  
131660chrR gggatggctaataaattgcggaag  
132145gRNAL agat ggtgccagagatattaaga  
132145gRNAR agac tcttaatatctctggcgacc  
132145L ggtcattttttgtctagctttaatgcggtagtGGTACC ggttcagtcgattagatcaactaatgcc  
132145MR cttcttaatatctctggcgactatataaaagacagcctgatatcttcc  
132145ML ggaaaatatcagctgtctttatatagtccagagatattaagaag  
132145R cgctgcccggattacagatcctctagagtcgacGGTACC ctgcaacgaaggtgcggcg  
132145seqM ggtcacctaaagaactgacc  
132145chrR caaagctggcggcaagcg

|               |                                                              |
|---------------|--------------------------------------------------------------|
| 132343gRNAL   | agat aatccttttagtgcfaat                                      |
| 132343gRNAR   | agac attgacactaaaaaggatt                                     |
| 132343L       | ggtcattttttgtctagcttfaatgcggtagttGGTACC gtaagcggccatcaactgcc |
| 132343R       | cgctgcccggattacagatcctctagatcgcacGGTACC ctaaatgaaggcgatcgacc |
| 132343MR      | gagaaaaatttactactaaaaaggatttcagaatatgaggattc                 |
| 132343ML      | gaatcctcatattctgaaatccttttagtgaattttctc                      |
| 132343seqM    | cgttttagctctgggcgaactttaac                                   |
| 132343chrR    | ggaggaaaaagaccaccaac                                         |
| 132721gRNAL   | agat ccctgttagatagaggct                                      |
| 132721gRNAR   | agac agccctctatctaaacagg                                     |
| 132721L       | ggtcattttttgtctagcttfaatgcggtagttGGTACC ccgagtagcaaaactcgcgg |
| 132721MR      | ggacacctaagaataggcagcgatagccctctatctaaacagggttaagcctgttcgg   |
| 132721ML      | ccgaacaggcttaaccctgtttagatagaggctatcgtgccctattcttaggtgcc     |
| 132721R       | cgctgcccggattacagatcctctagatcgcacGGTACC ccagacctgataggcgatcg |
| 132721seqM    | cgcttgggagctgaaactcg                                         |
| 132721chrR    | ctgcttgggcatcgcgatc                                          |
| 4780ML-2973   | GCCGGTTGCTATGTaTGGCCAGAAGAcCGGGTGTTAATC                      |
| 4780MR2-2973  | GATTAACACCCGgTCTTCTGGCCAtACATAGCAACCCGGC                     |
| 2605-2973ML   | ccttgctggcgaccgatcgcatacccatgcagcccgcatagc                   |
| 2605-2973MR   | gctatggcgggctgcatggggtatgcgacggtgcgccgacgaagg                |
| 131058-2973ML | ctcaccagaacagaccctttaagaaaaataaatagatccgctg                  |
| 131058-2973MR | cagcggatctattatgttttcttaaaaggctctgttctggtgag                 |
| 2605chrL      | CTTGAGCTTTGCCGATGAAG                                         |
| 2605chrR      | CGGTCAAGCCACGATTATCC                                         |
| 6025chrL      | GGCTCTACAAGCAACTGGTCCG                                       |
| 6025chrR      | CAATTCATCGCTGGTTAAGCCG                                       |
| 6570chrL      | GCTCACGGCGGTGTGTGG                                           |
| 6570chrR      | GCGTTCAAAGCAACGGTAATCTC                                      |
| 6650chrL      | GGCTCGATCTACCAGGCGG                                          |
| 6650chrR      | CAATAATTGCCTCCGTCAGCAGC                                      |
| 8615chrL      | GCCGAAATCAAGGAGCAGG                                          |
| 8615chrR      | CATGTAGGCGACGAGGATG                                          |
| 1297chrL      | CTCTGGGCGAATCCGAGTGG                                         |
| 1297chrR      | CCGGCGCTACACGAGAATC                                          |
| 12130chrL     | GAGGACGCTGGCTGAGGAG                                          |
| 12130chrR     | CTGGCCCAGAGTGCGATCG                                          |
| 11685chrL     | GGTGAGCACCTGGGTCGC                                           |
| 11685chrR     | CGTCCGAAGTAAGCGATCG                                          |
| 6850chrL      | CCTTCAAGGTGATCAAGTCTGGC                                      |
| 6850chrR      | GTACATCGGGTCTGCGCCTG                                         |
| 4780chrL      | GGCGATGGTCGATGTGGCTC                                         |
| 4780chrR      | CGATTTGACGACCATTACGAGC                                       |
| 0705chrL      | CGGATACAGCACTGTCACGAAC                                       |
| 0705chrR      | GATCTTCTAAGGACTCCTCAGCC                                      |
| 3335chrL      | GCGGCTCTGACGATCCTG                                           |
| 3335chrR      | GGCAAATCCCAGAAGAAGCTGAG                                      |
| 3855chrL      | CGACGATTGGCAAACCTCGC                                         |

|           |                                                                     |
|-----------|---------------------------------------------------------------------|
| 3855chrR  | CGTATTCCGAGTAAAACAGCGTGG                                            |
| 5865chrL  | CTGCTCTGGGCTTAGATCTGG                                               |
| 5865chrR  | GATCGCTGGGGACTCTCGC                                                 |
| 4780 hisL | TATACATATGGGCAGCAGCCATCACCACCATCACCATTCTAGTGTGCCAGATGTTGGCATTATCTAC |
| 4780Re    | aataGGTACCGCAGTCTCAGTAAATGAGTGTGC                                   |



## Datasets

**Dataset S1: Loci identified to have >1.5-fold bidirectional change with allele substitutions via RNA-Sequencing**

**Dataset S2: Enrichment Analysis Output**

**Dataset S3: Comparison of transcriptomes of wild type *Synechococcus* 2973 to wild type *Synechococcus* 7942**

**Dataset S4: Genes identified to show significant changes in expression in a bidirectional comparison between *Synechococcus* 2973 and *Synechococcus* 2973 with the *Synechococcus* 7942 allele of ATP Synthase AND *Synechococcus* 7942 and *Synechococcus* 7942 with the *Synechococcus* 2973 allele of ATP Synthase**

**Dataset S5: Genes identified to show significant changes in expression in a bidirectional comparison between *Synechococcus* 2973 and *Synechococcus* 2973 with the *Synechococcus* 7942 allele of NAD<sup>+</sup> Kinase AND *Synechococcus* 7942 and *Synechococcus* 7942 with the *Synechococcus* 2973 allele of NAD<sup>+</sup> Kinase**

**Dataset S6: Genes identified to show significant changes in expression in a bidirectional comparison between *Synechococcus* 2973 and *Synechococcus* 2973 with the *Synechococcus* 7942 allele of *rpaA* AND *Synechococcus* 7942 and *Synechococcus* 7942 with the *Synechococcus* 2973 allele of *rpaA***

**Dataset S7: A comparison of the alterations in gene expression that occurred as multiple alleles from *Synechococcus* 2973 were incorporated into *Synechococcus* 7942. In a separate tab, A comparison of the alterations in gene expression that occurred as multiple alleles from *Synechococcus* 7942 were incorporated into *Synechococcus* 2973**
